# Supplementary material for: Malvidin and its derivatives exhibit antioxidant properties by inhibiting MAPK signaling pathways to reduce endoplasmic reticulum stress in ARPE-19 cells
Source: Royal Society of Chemistry journal article supplement (doi:10.1039/d1fo01345a), 2021-01-01
Supplement: d1fo01345a1.pdf [file d1fo01345a1.pdf]

### Supplementary Figure

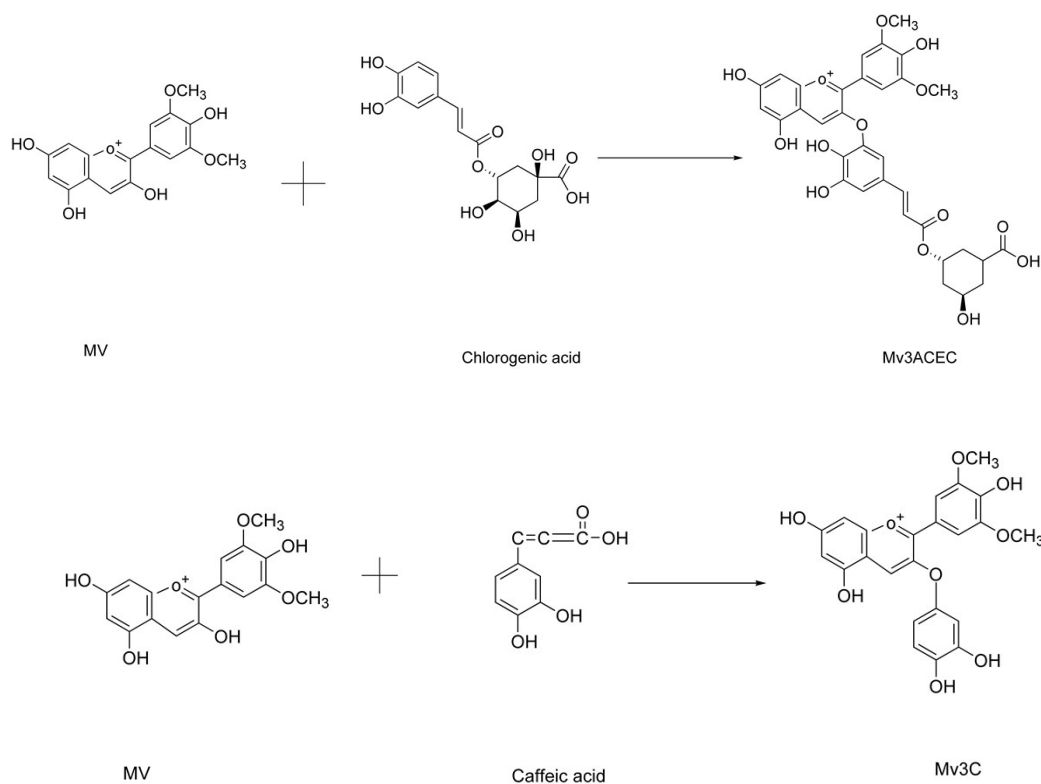

### The structure of Mv3ACEC and Mv3C

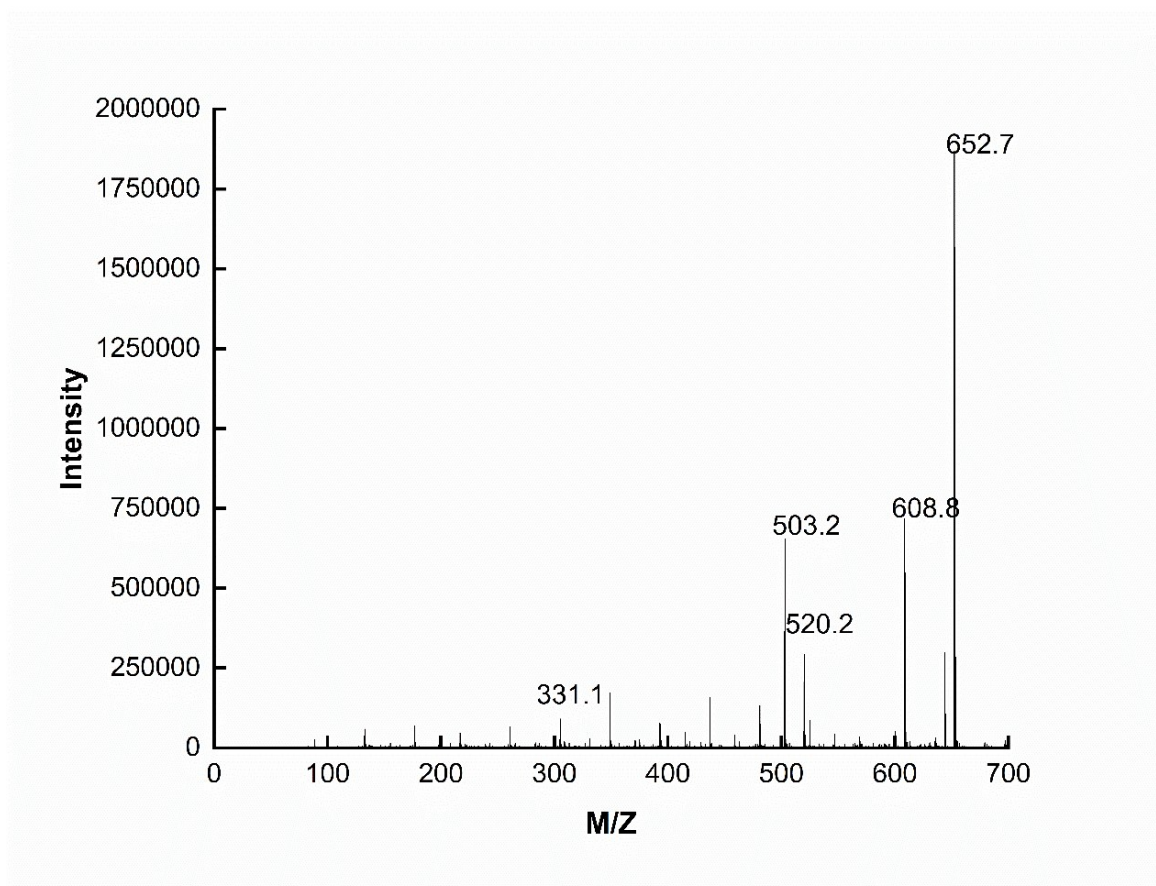

### Mass spectrometry of Mv3ACEC

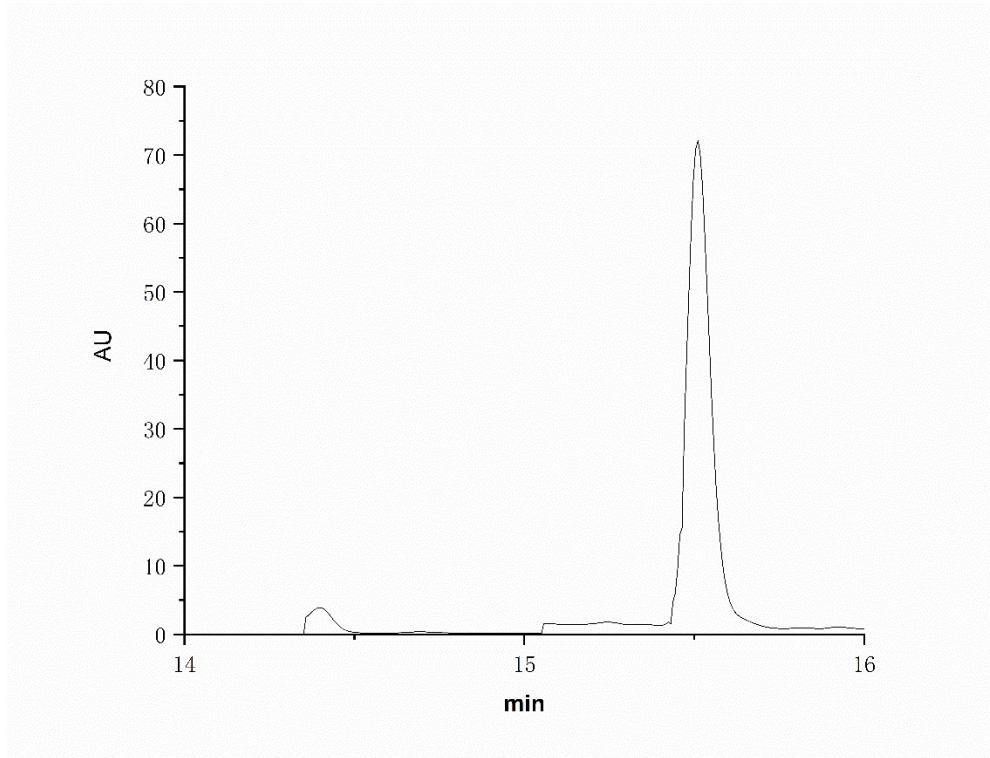

### High-performance liquid chromatography (HPLC) chromatograms of Mv3ACEC

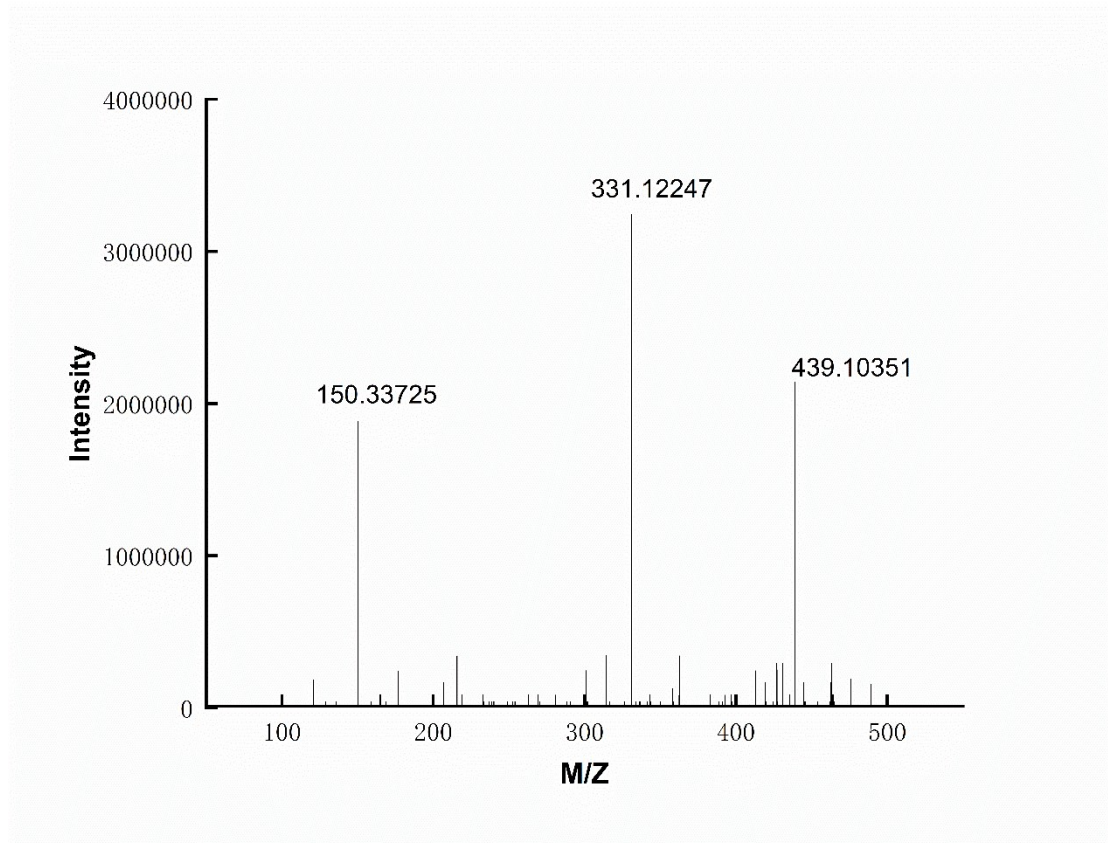

### Mass spectrometry of Mv3C

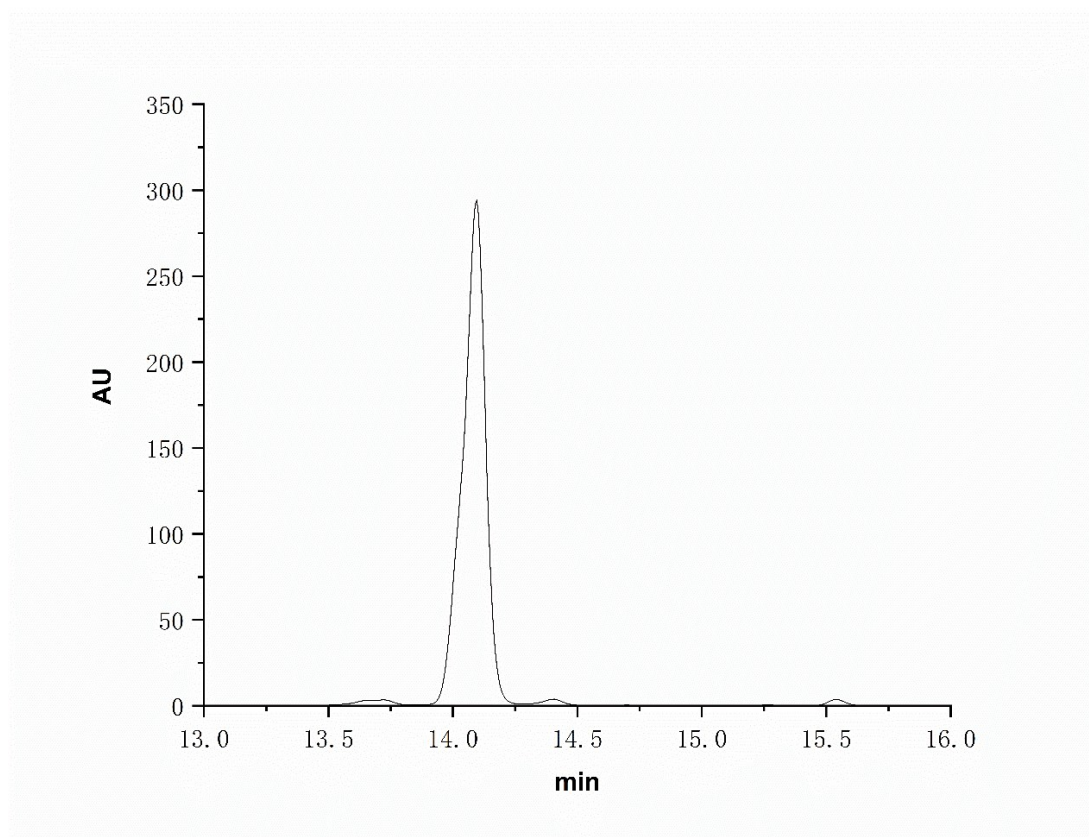

**High-performance liquid chromatography (HPLC) chromatograms of Mv3C**
